# Supplementary material
Source: PubMed Central journal article supplement (PMC3717197)
Supplement: Supp_Figure7.pdf [file Supp_Figure7.pdf]

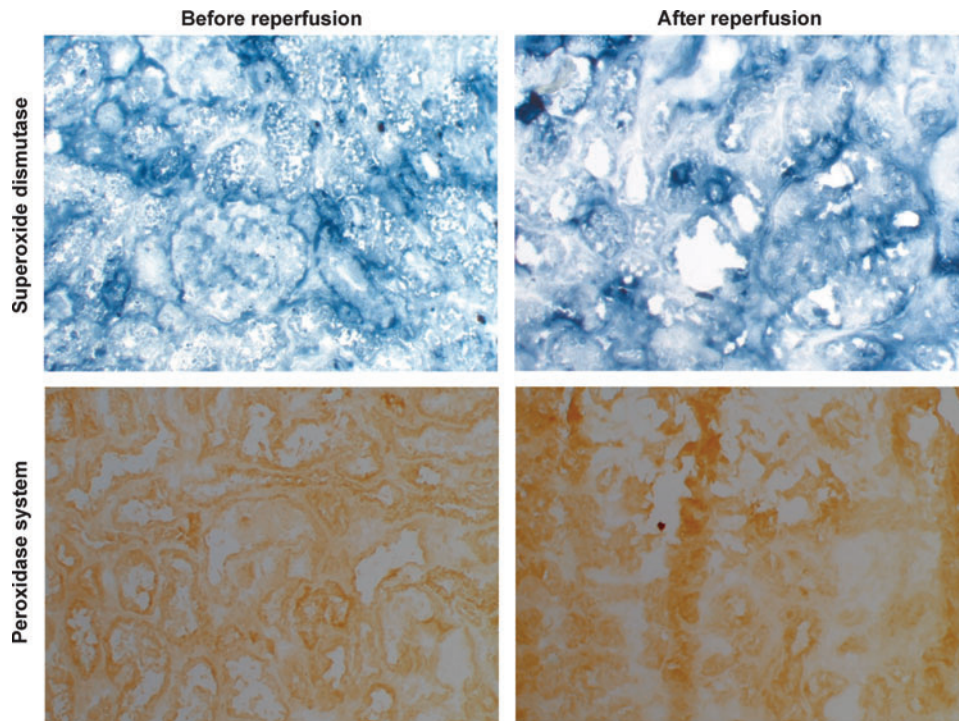

**SUPPLEMENTARY FIG. S7. Endogenous antioxidant enzymes.** Histochemical analysis showing that the endogenous antioxidant enzyme systems, superoxide dismutase and peroxidases (catalase and glutathione peroxidase), are active in pre- and postperfusion kidney biopsies.
